# Supplementary material for: (+)-Usnic Acid and Its Derivatives as Inhibitors of a Wide Spectrum of SARS-CoV-2 Viruses
Source: MDPI journal article supplement (doi:10.3390/v14102154), 2022-09-29
Supplement: s1 [file s1]

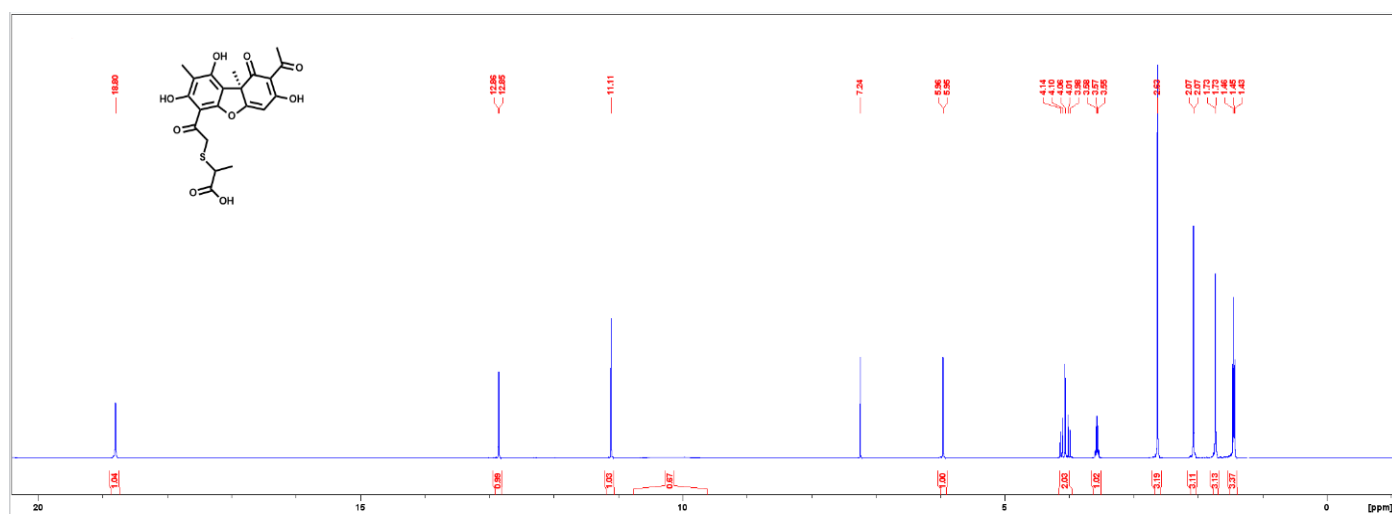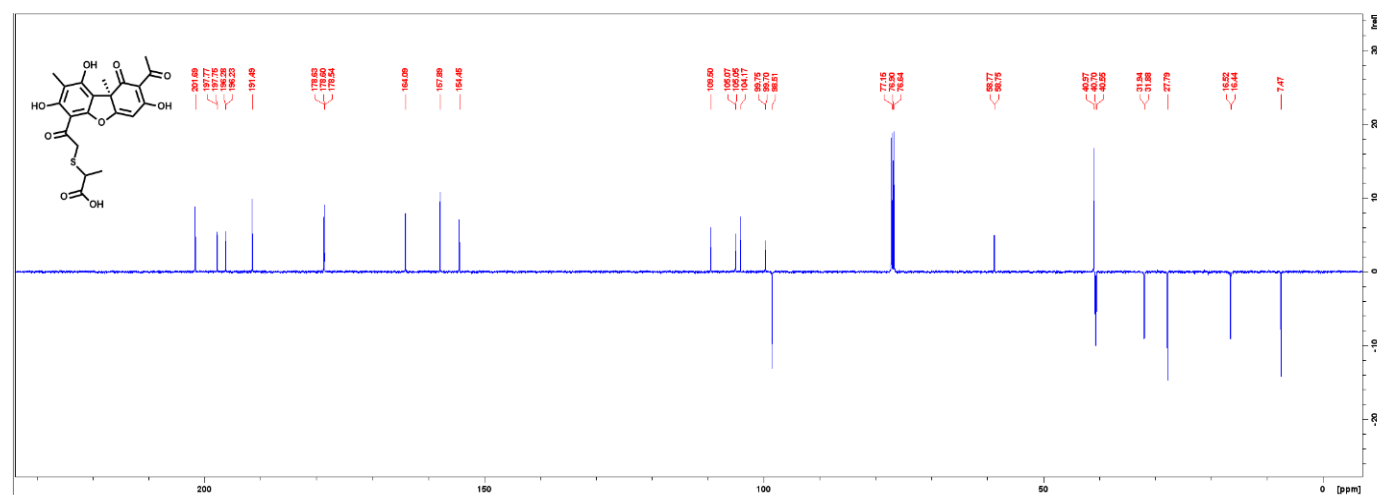

OL-10-18-4\_220331162940 #1 RT: 0.00 AV: 1 NL: 1.54E6  
T: + c EI Full ms [ 32.50-500.50]

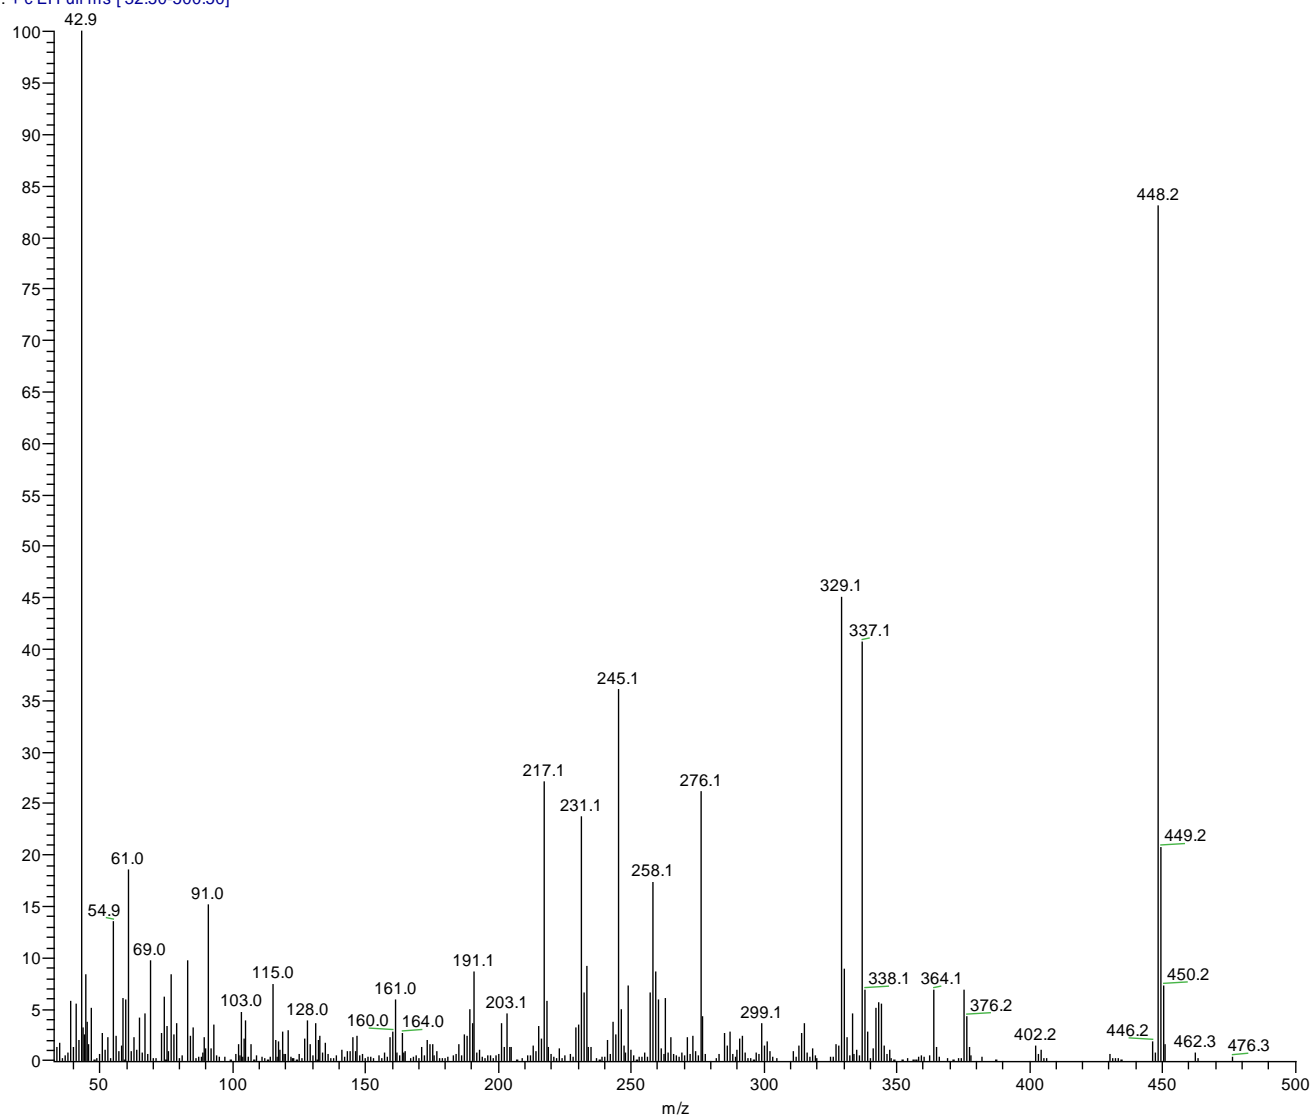

Figure S3. DFS spectrum of 5b.

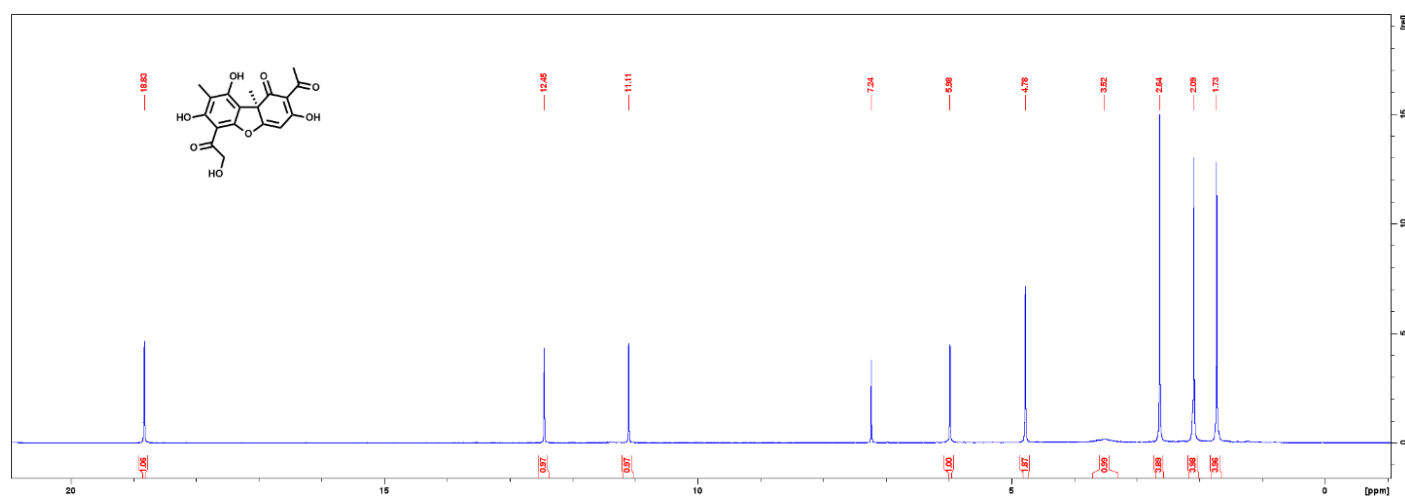

Figure S4. NMR <sup>1</sup>H spectrum of 10.

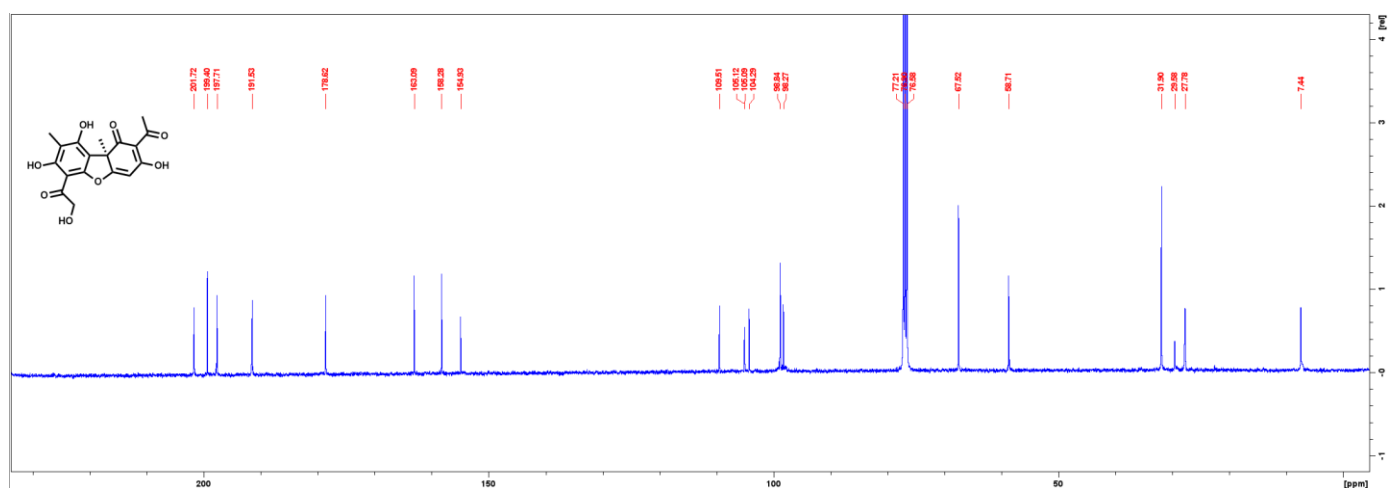Figure S5. NMR  $^{13}\text{C}$  spectrum of 10.

O18-31 #24 RT: 1.35 AV: 1 NL: 3.63E5  
T: + c EI Full ms [32.50-400.50]

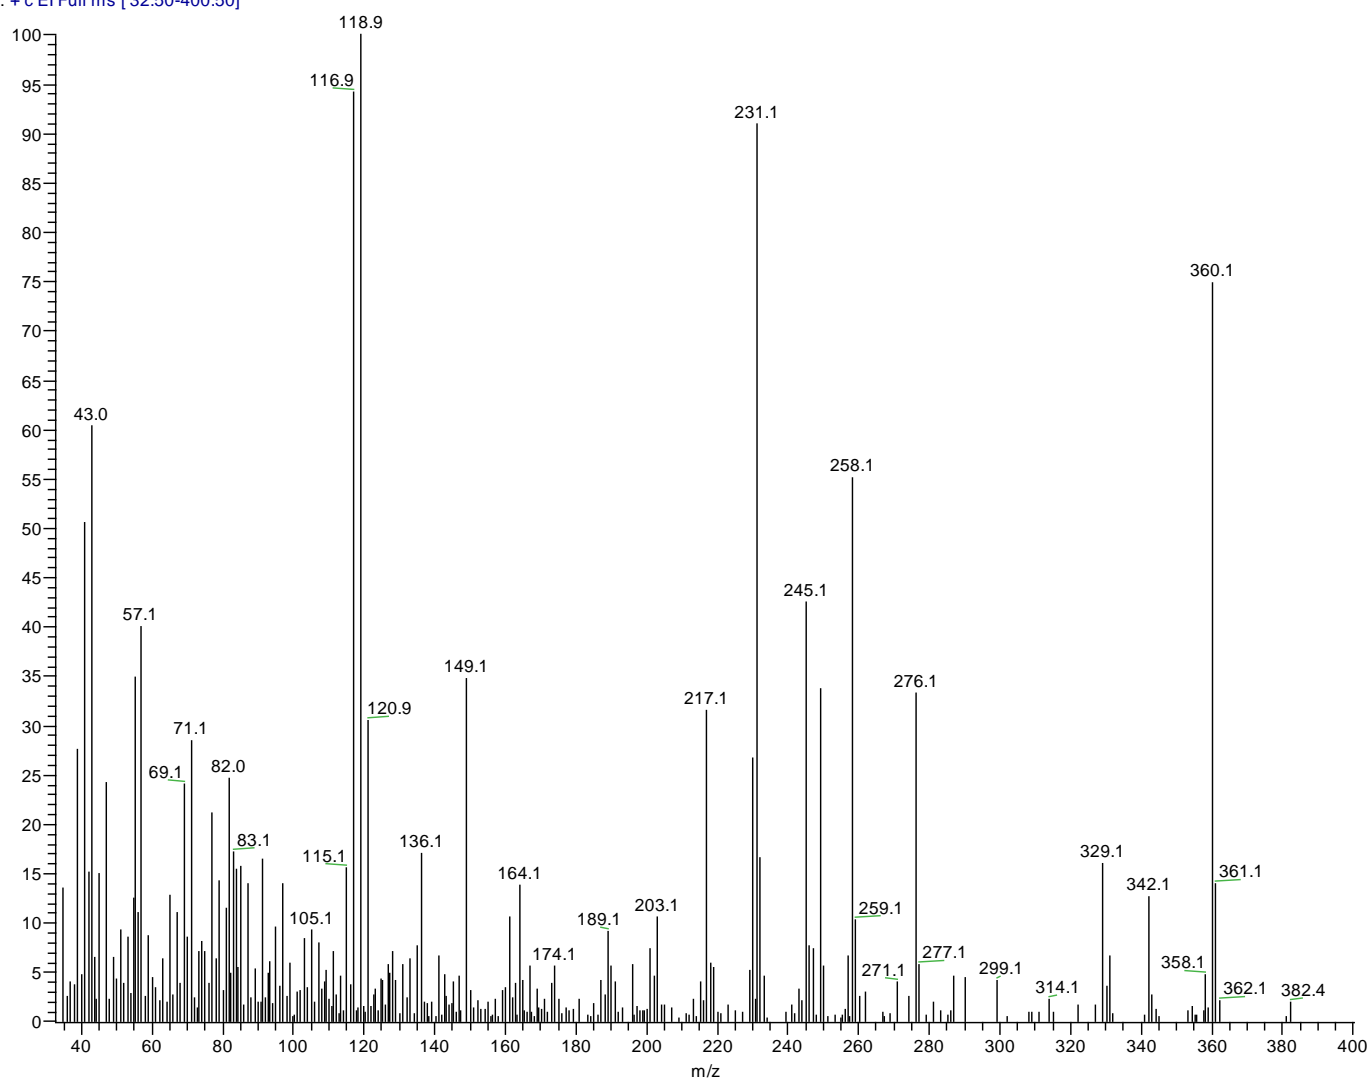

Figure S6. DFS spectrum of 10.

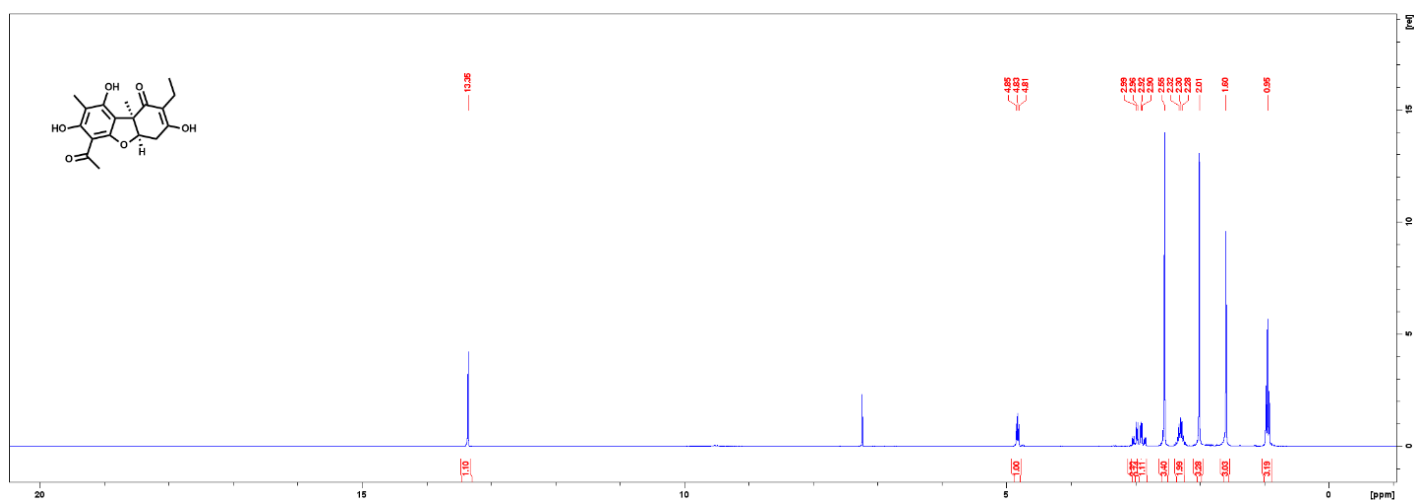Figure S7. NMR <sup>1</sup>H spectrum of 12.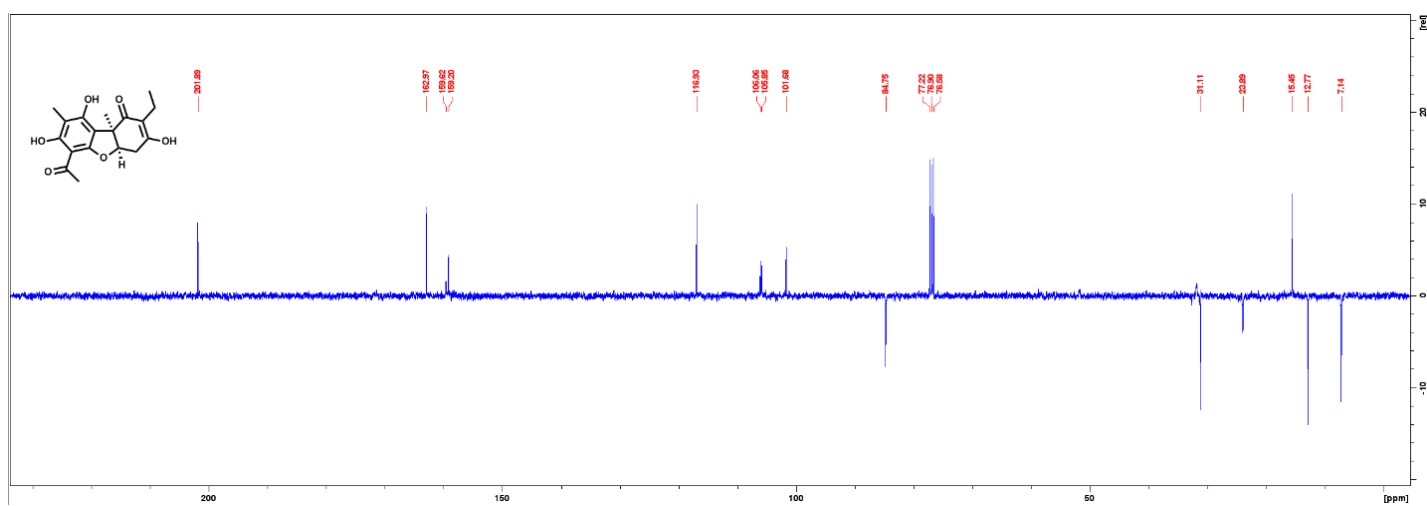Figure S8. NMR <sup>13</sup>C spectrum of 12.

OL11-104-6 #19 RT: 1.06 AV: 1 NL: 4.25E5  
T: + c EI Full ms [ 14.50-380.50]

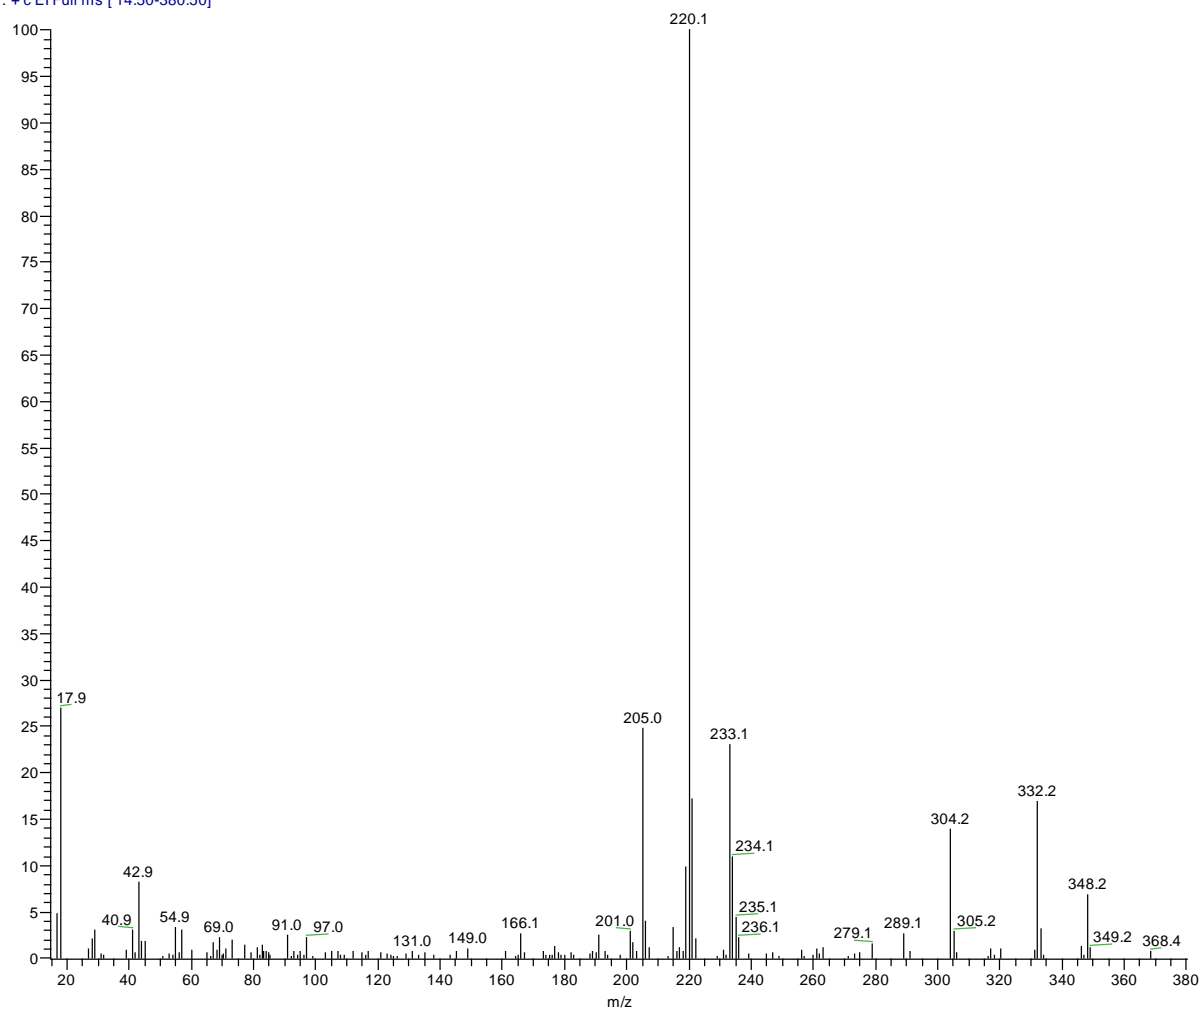

Figure S9. DFS spectrum of 12.

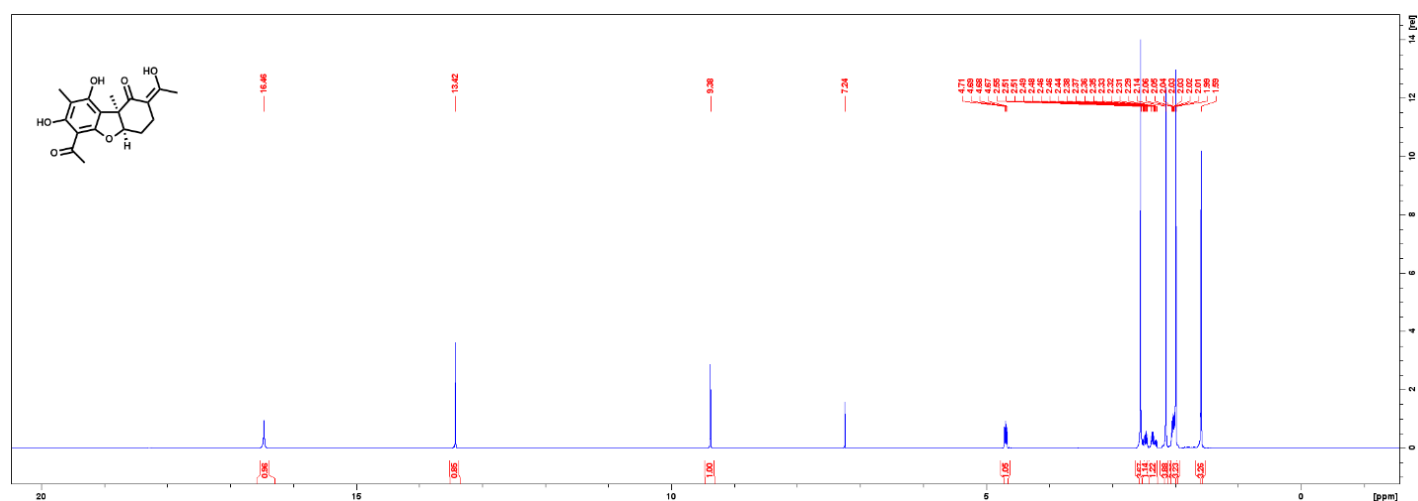

Figure S10. NMR <sup>1</sup>H spectrum of 13.

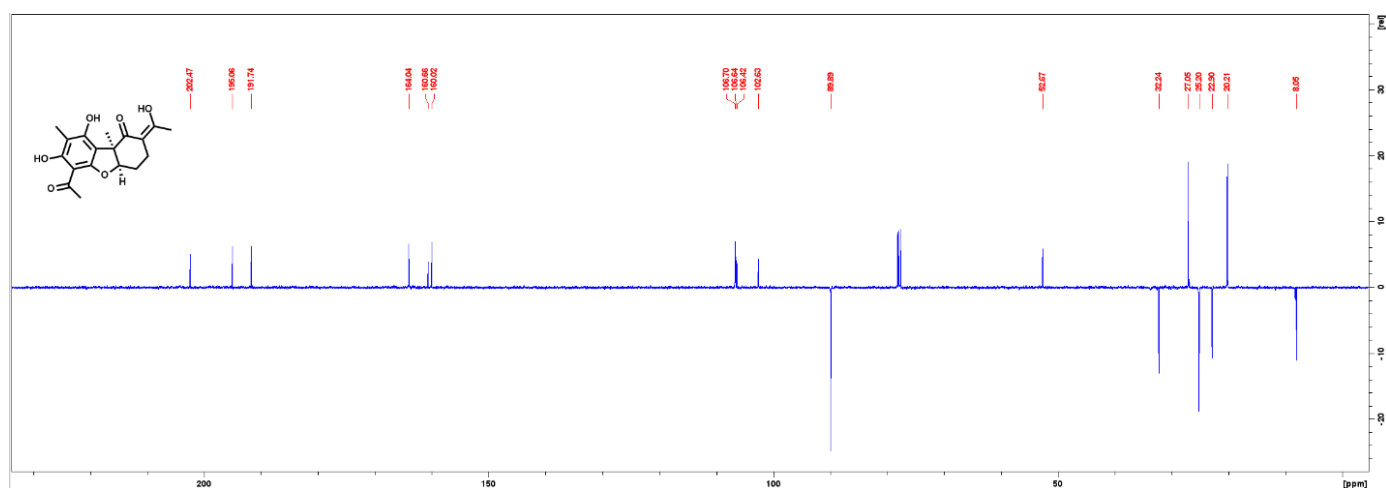Figure S11. NMR  $^{13}\text{C}$  spectrum of 13.

OL11-104-1 #4 RT: 0.18 AV: 1 NL: 2.36E6  
T: + c EI Full ms [32.50-380.50]

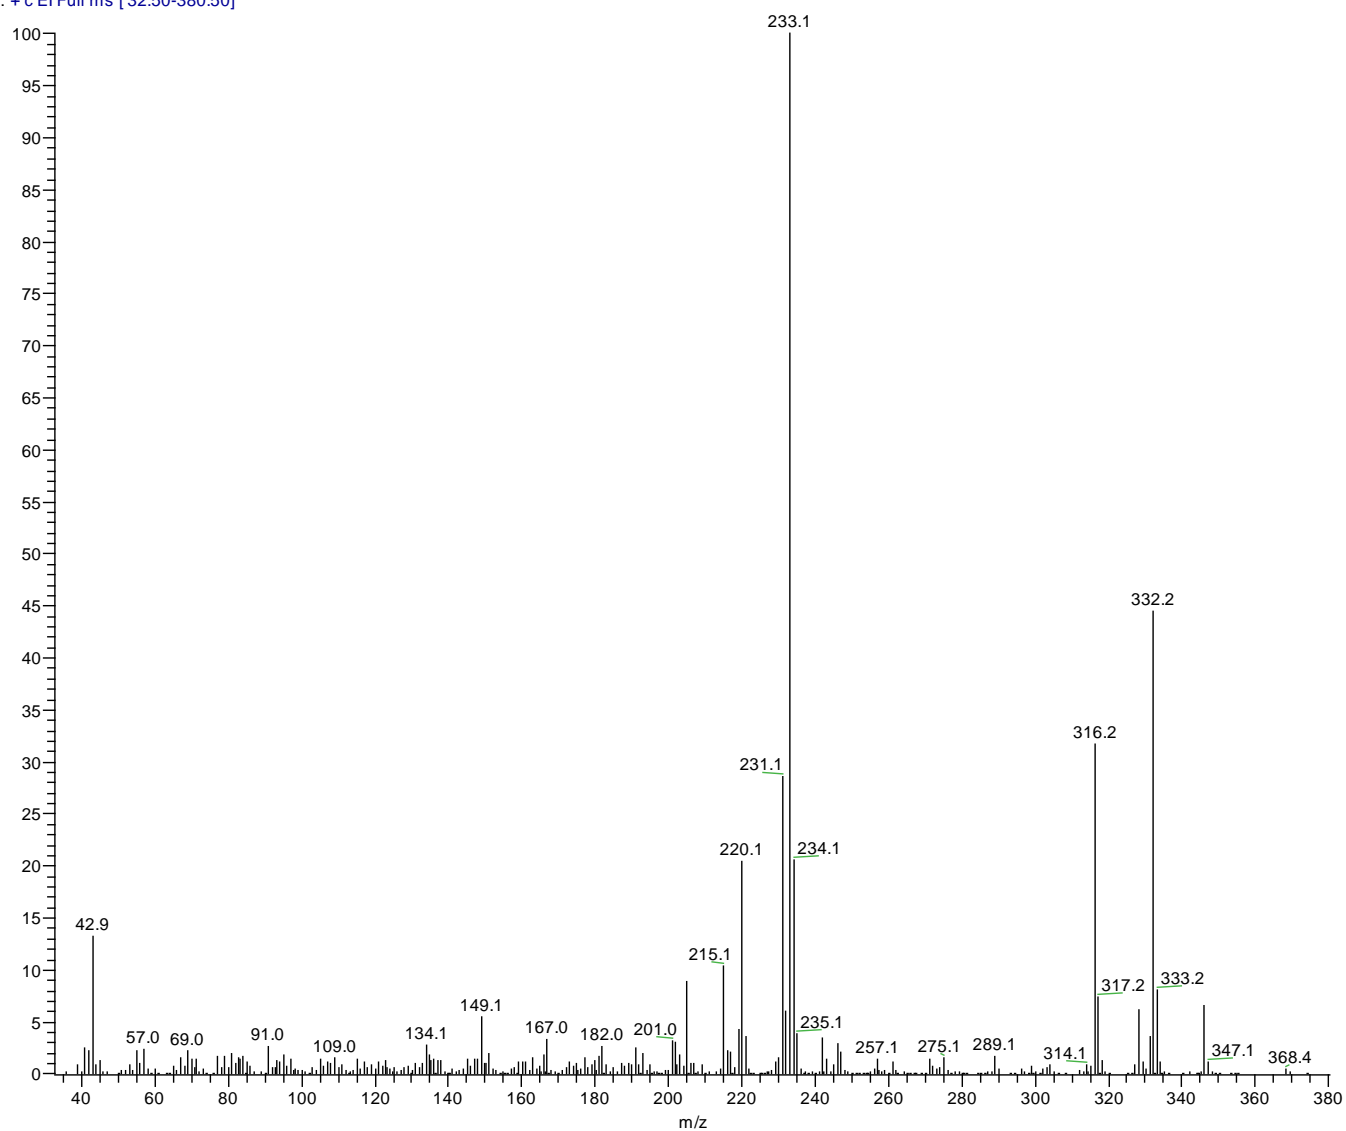

Figure S12. DFS spectrum of 13.

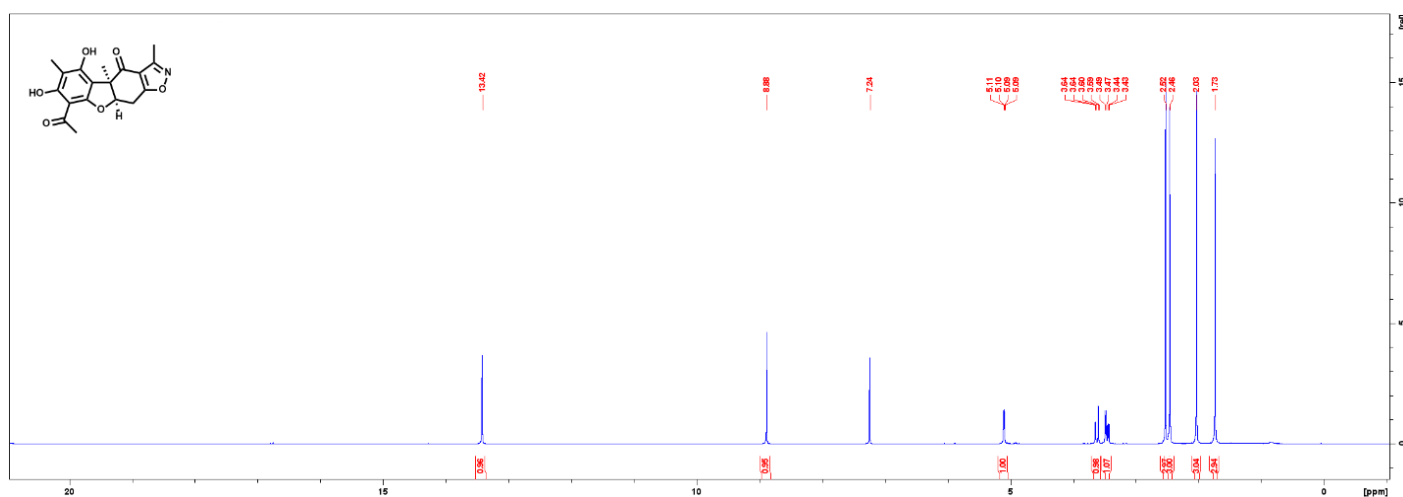Figure S13. NMR <sup>1</sup>H spectrum of 14.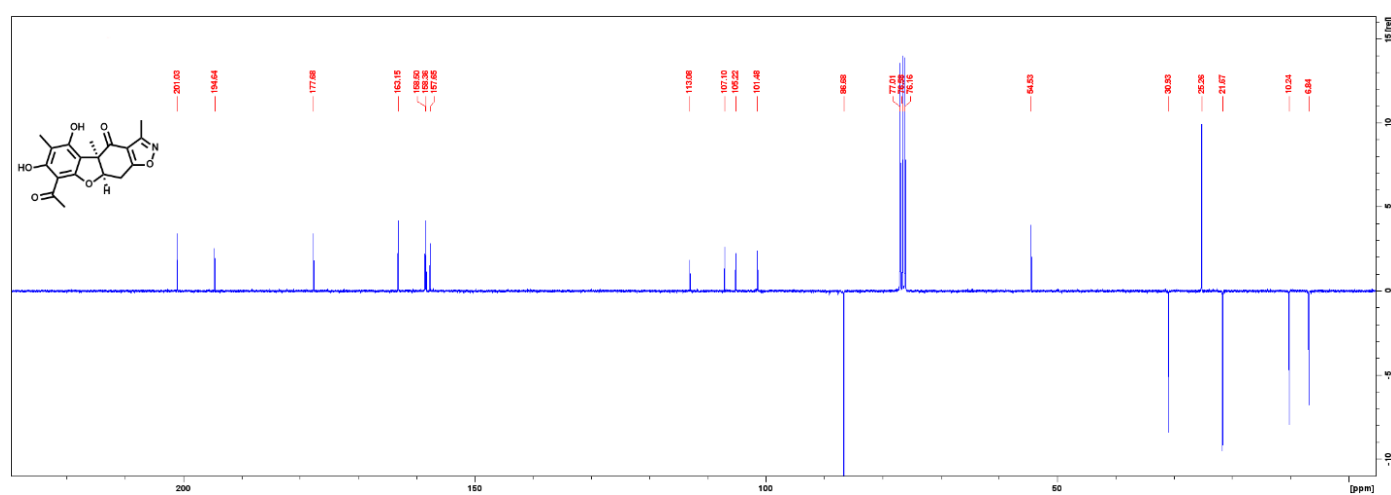Figure S14. NMR <sup>13</sup>C spectrum of 14.

OL-12-120-10 #12 RT: 0.82 AV: 1 NL: 1.03E5  
T: + c EI Full ms [14.50-370.50]

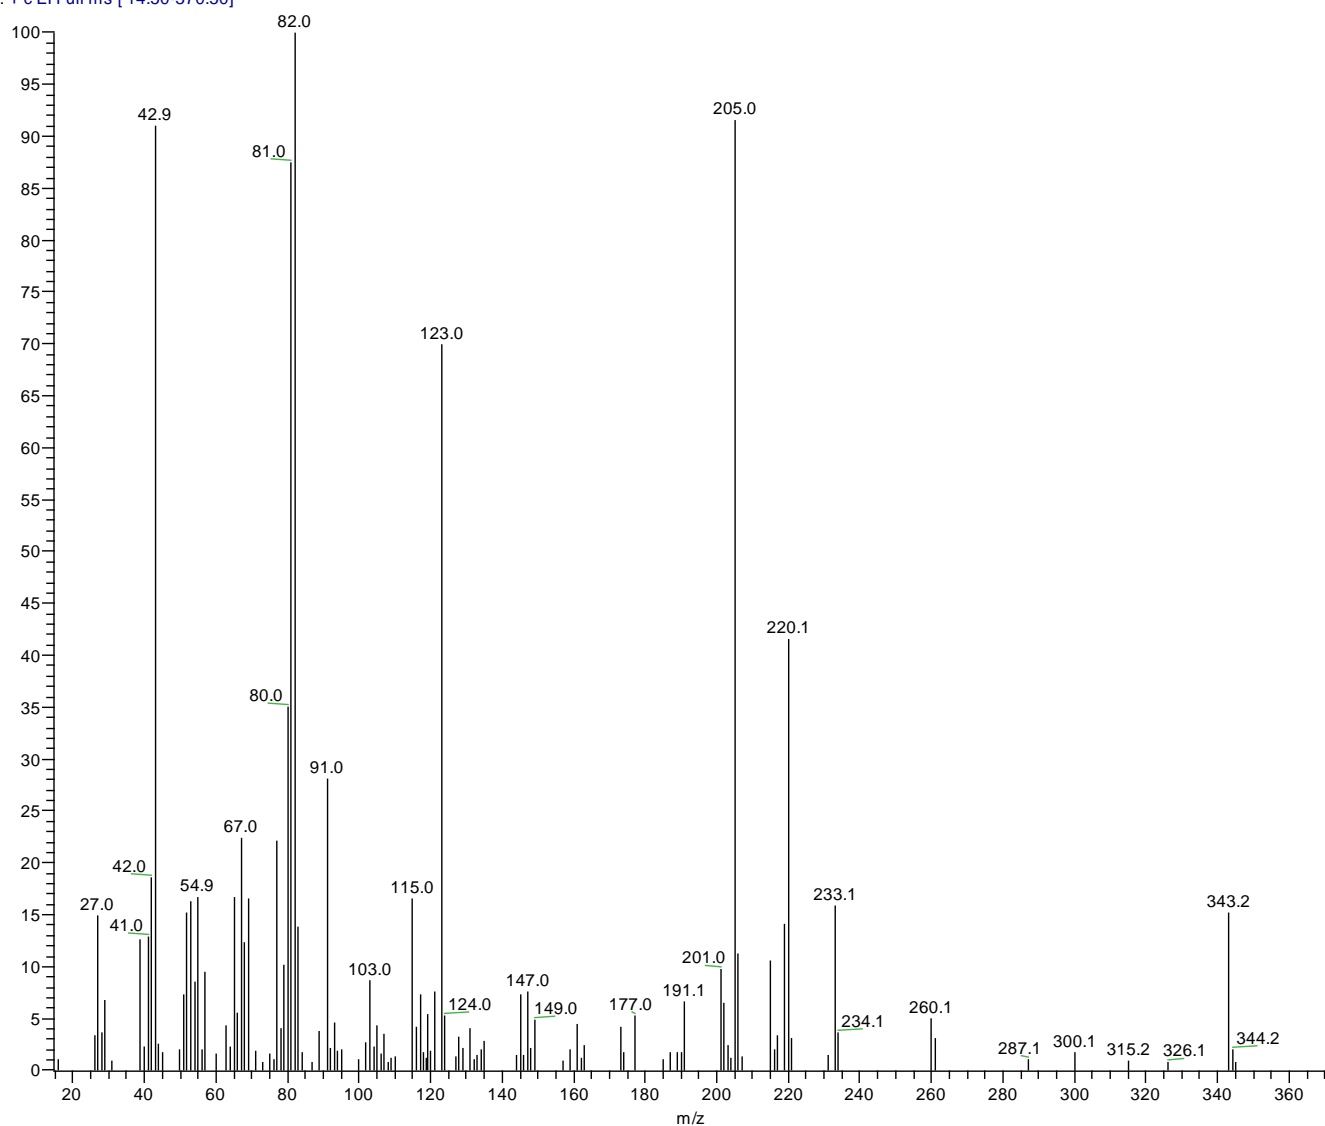

Figure S15. DFS spectrum of 14.

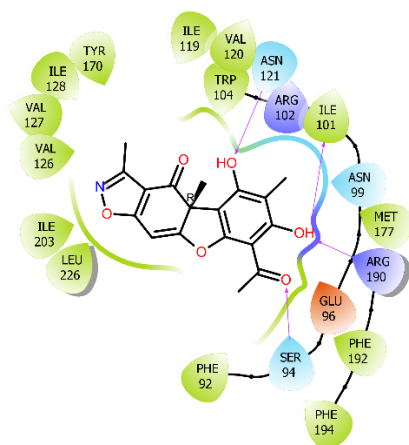

2

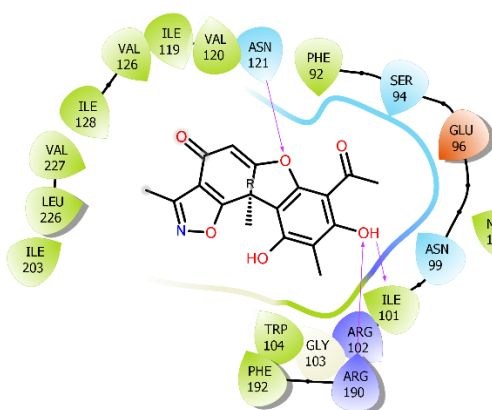

3

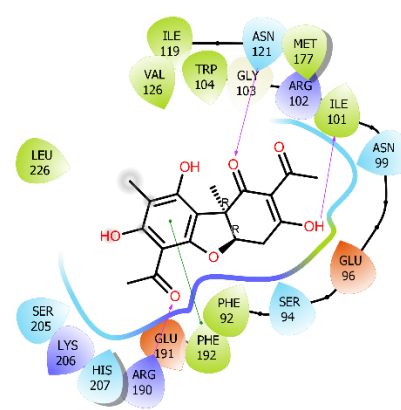

11



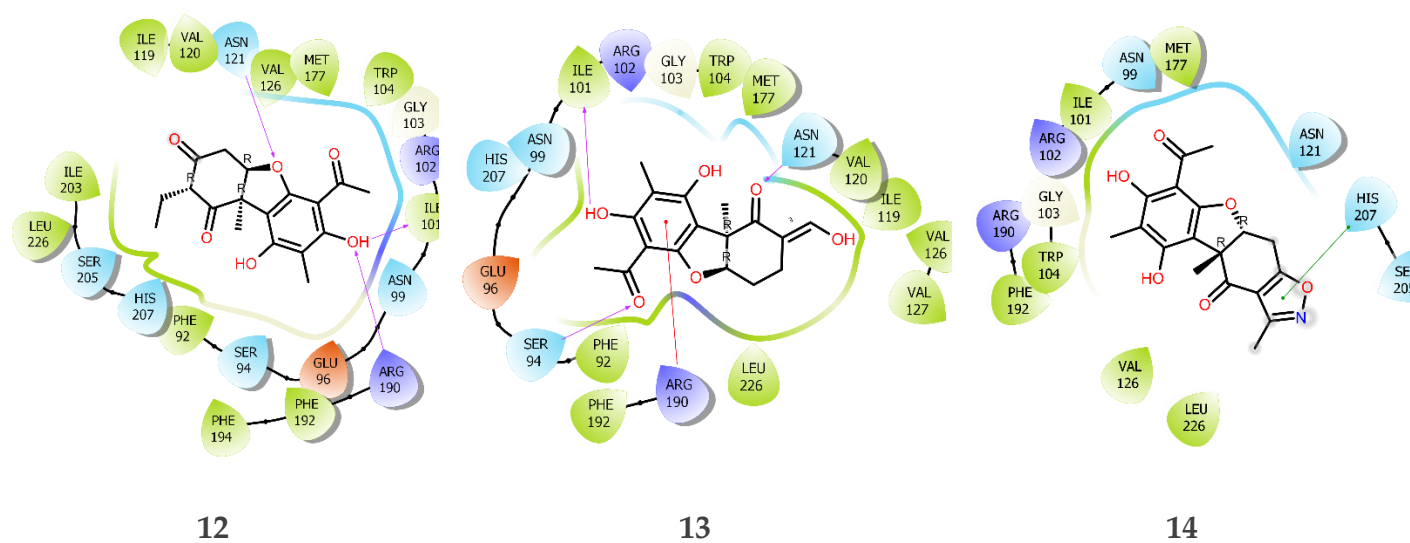

Figure S16. Location ligands in the biliverdin binding site.

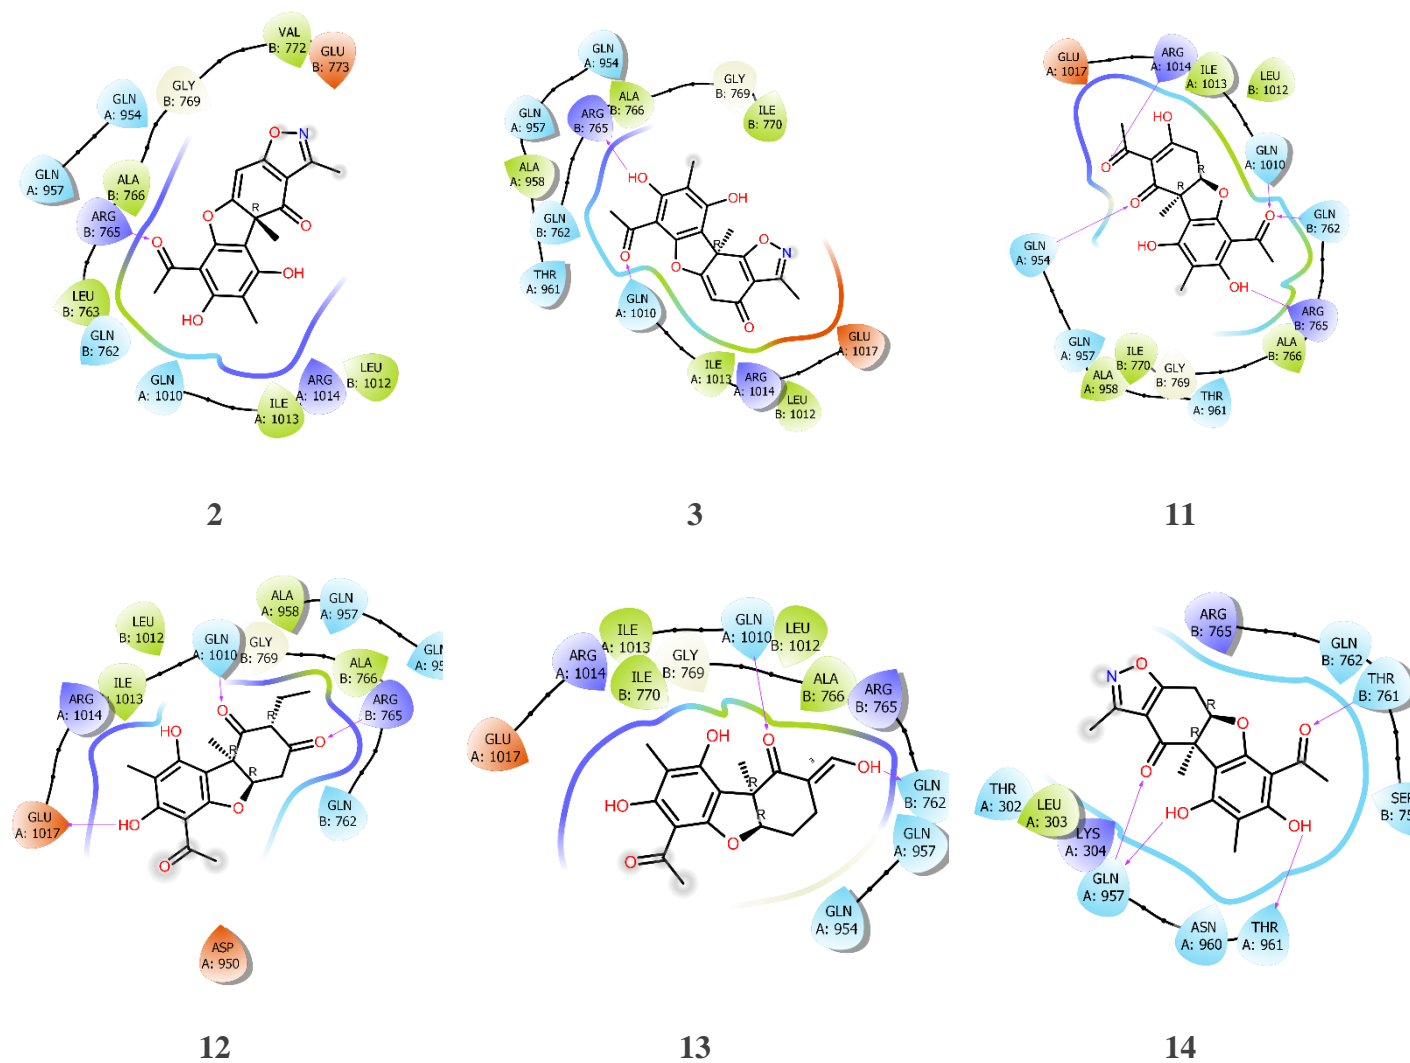

Figure S17. Location ligands in the UA-30 and nelfinavir binding site.

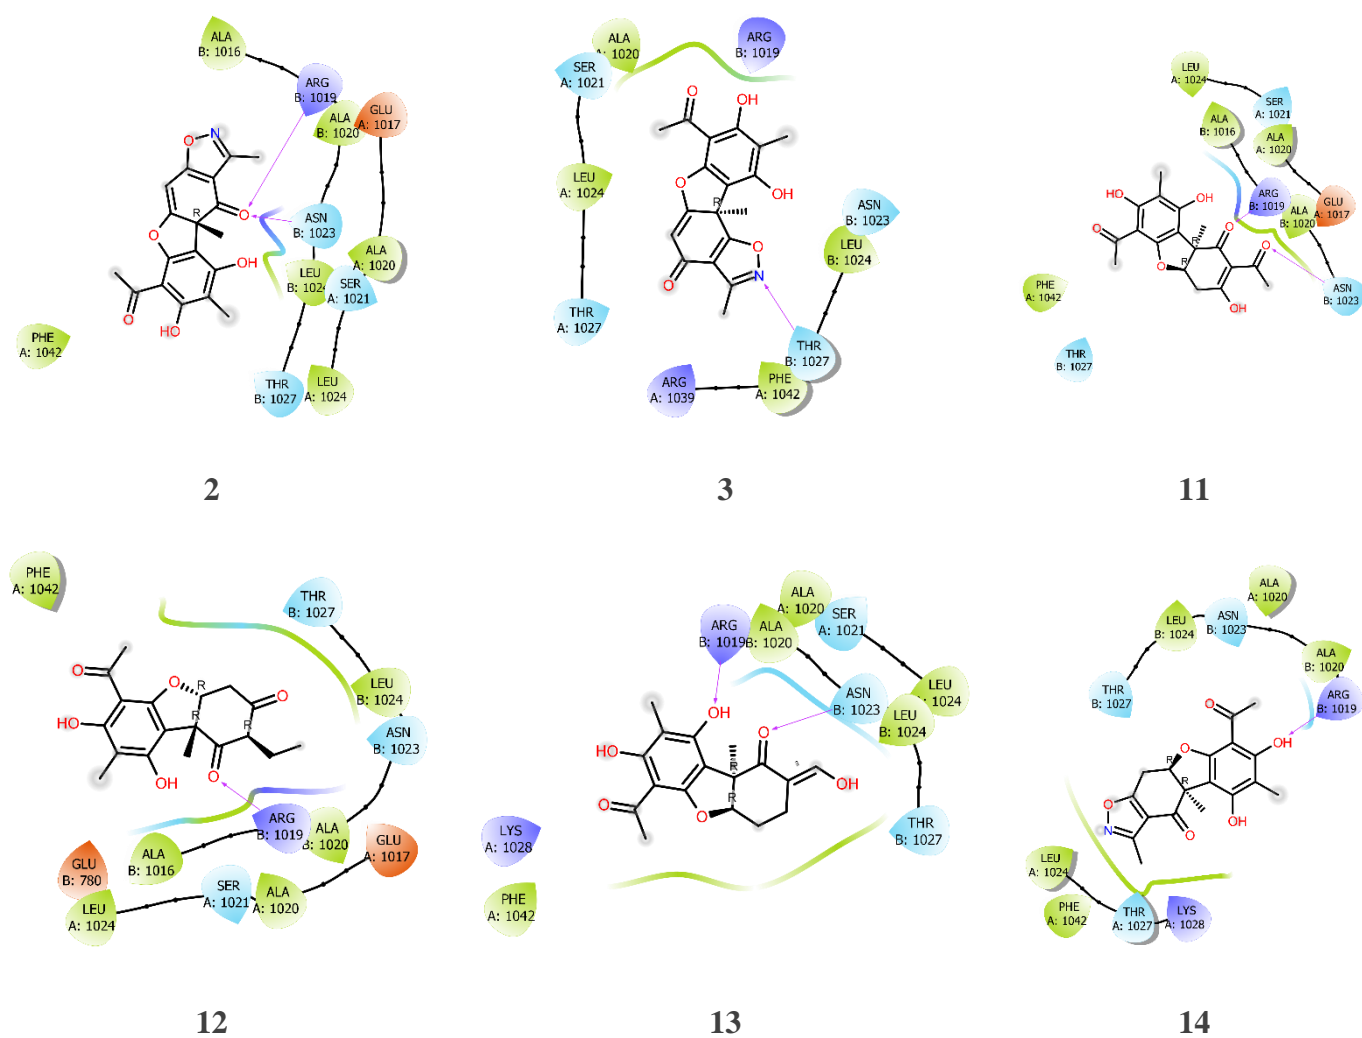

Figure S18. Location ligands in the umifenovir binding site.

Table S1. Molecular modeling results.

| #  | Structure                                                                                                                                                                            | In Vivo<br>(IC <sub>50</sub> ) | In Vitro<br>(Pseudo-<br>type-Based<br>Assay) | Matched<br>Ligand Site | Glide<br>Score | Emodel  | IFD Score | H-Bond                                 | Other Interaction                                                                  | Clash  |
|----|--------------------------------------------------------------------------------------------------------------------------------------------------------------------------------------|--------------------------------|----------------------------------------------|------------------------|----------------|---------|-----------|----------------------------------------|------------------------------------------------------------------------------------|--------|
|    | BILIVERDIN BINDING SITE                                                                                                                                                              |                                |                                              |                        |                |         |           |                                        |                                                                                    |        |
|    |                                                                                                                                                                                      |                                |                                              |                        |                |         |           |                                        | 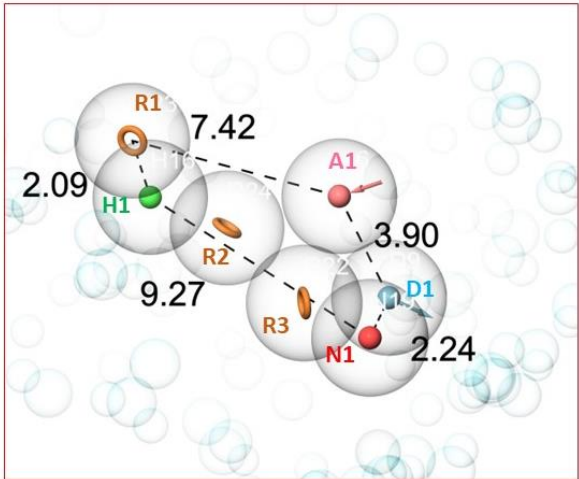 |        |
| 2  | <br>Chemical Formula: C <sub>18</sub> H <sub>15</sub> NO <sub>6</sub><br>Molecular Weight: 341,31  | n/a                            | yes                                          | R1; H1; R2;<br>A1      | −6.118         | −43.497 | −614.43   | Asn121,<br>Ser94<br>Arg120,<br>Ile101, | Leu226, Ile203,<br>Trp104 hydro-<br>phobic                                         | Asn121 |
| 3  | <br>Chemical Formula: C <sub>18</sub> H <sub>15</sub> NO <sub>6</sub><br>Molecular Weight: 341,31 | 9.2                            | > 25                                         | R1; H1; R2;<br>A1      | −8.124         | −57.934 | −613.90   | Asn121,<br>Arg120,<br>Ile101,          | Trp104 hydro-<br>phobic                                                            |        |
| 14 | <br>Chemical Formula: C <sub>18</sub> H <sub>17</sub> NO <sub>6</sub><br>Molecular Weight: 343,33 | n/a                            | n/a                                          | H1; R2; A1             | −5.406         | −43.406 | −615.87   | none                                   | His207 pi-pi<br>stacking; Ile101,<br>Trp104 hydro-<br>phobic                       | Ile101 |
| 11 | <br>Chemical Formula: C <sub>18</sub> H <sub>18</sub> O <sub>7</sub><br>Molecular Weight: 346,33  | 21.0                           | 22                                           | R1; H1; D1;<br>R3      | −7.465         | −63.583 | −617.77   | Asn121,<br>Ile101,<br>Arg190           | Phe190 pi-pi<br>stacking                                                           |        |
| 12 | <br>Chemical Formula: C <sub>18</sub> H <sub>20</sub> O <sub>6</sub><br>Molecular Weight: 332,35  | 91.0                           | >25 (5)                                      | H1; R2; A1             | −8.116         | −55.76  | −616.79   | Asn121,<br>Ile101,<br>Arg190           | Ile203, Phe92,<br>Trp104 hydro-<br>phobic                                          |        |

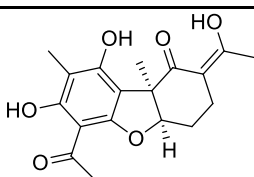

|    |                                                                                   |     |   |            |        |         |         |                         |                        |
|----|-----------------------------------------------------------------------------------|-----|---|------------|--------|---------|---------|-------------------------|------------------------|
| 13 |  | 6.7 | 5 | H1; R2; A1 | -8.908 | -70.987 | -615.62 | Asn121;<br>Ile101; Se94 | Arg190 –<br>pi-cation; |
|----|-----------------------------------------------------------------------------------|-----|---|------------|--------|---------|---------|-------------------------|------------------------|

Chemical Formula: C<sub>18</sub>H<sub>20</sub>O<sub>6</sub>  
Molecular Weight: 332,35

UA-30 AND NELFINAVIR BINDING SITE

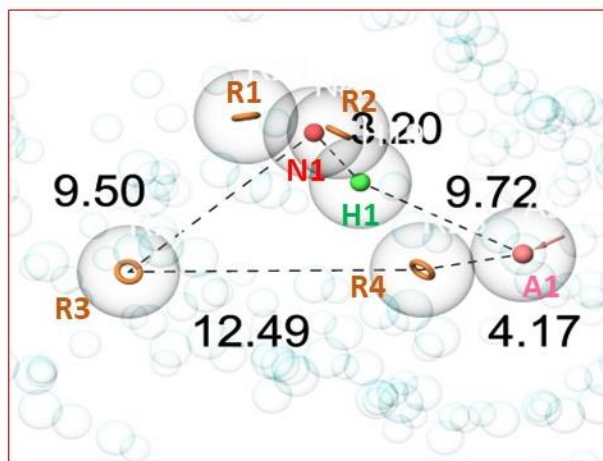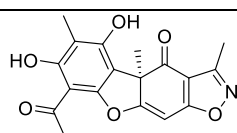

|                                                                                                     |                                                                                     |     |     |            |        |         |          |           |                       |
|-----------------------------------------------------------------------------------------------------|-------------------------------------------------------------------------------------|-----|-----|------------|--------|---------|----------|-----------|-----------------------|
| 2                                                                                                   |  | n/a | yes | A1; H1; R4 | -6.923 | -53.724 | -6010.48 | B: Arg765 | B: Ala766 hydrophobic |
| <p>Chemical Formula: C<sub>18</sub>H<sub>15</sub>NO<sub>6</sub></p> <p>Molecular Weight: 341.31</p> |                                                                                     |     |     |            |        |         |          |           |                       |

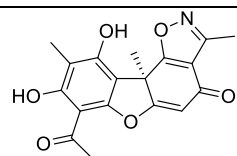

|                                                                                               |                                                                                     |     |      |                   |        |         |          |                         |                                          |           |
|-----------------------------------------------------------------------------------------------|-------------------------------------------------------------------------------------|-----|------|-------------------|--------|---------|----------|-------------------------|------------------------------------------|-----------|
| 3                                                                                             |  | 9.2 | > 25 | A1; H1; R2;<br>R4 | -7.513 | -63.046 | -6011.35 | B: Arg765<br>A: Gln1010 | A: Leu1013; B:<br>Leu1012.<br>A: Gln954; | B: Arg765 |
| Chemical Formula: C <sub>18</sub> H <sub>15</sub> NO <sub>6</sub><br>Molecular Weight: 341,31 |                                                                                     |     |      |                   |        |         |          |                         |                                          |           |

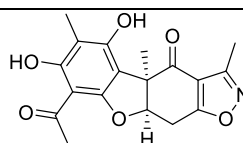

|                                                                                                     |                                                                                     |     |     |    |        |         |          |                                     |                         |           |
|-----------------------------------------------------------------------------------------------------|-------------------------------------------------------------------------------------|-----|-----|----|--------|---------|----------|-------------------------------------|-------------------------|-----------|
| 14                                                                                                  |  | n/a | n/a | R1 | -6.192 | -48.886 | -6011.77 | A: Gln957<br>A: Thr961<br>B: Thr761 | B: Arg765<br>B: Ser768. | A: Thr302 |
| <p>Chemical Formula: C<sub>18</sub>H<sub>17</sub>NO<sub>6</sub></p> <p>Molecular Weight: 343.33</p> |                                                                                     |     |     |    |        |         |          |                                     |                         |           |

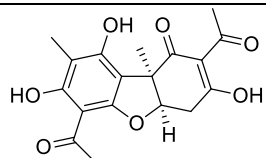

|    |                                                                                                                                                                                     |      |    |    |        |         |          |                                                                     |                            |           |
|----|-------------------------------------------------------------------------------------------------------------------------------------------------------------------------------------|------|----|----|--------|---------|----------|---------------------------------------------------------------------|----------------------------|-----------|
| 11 |  <p>Chemical Formula: C<sub>18</sub>H<sub>18</sub>O<sub>7</sub><br/>Molecular Weight: 346.33</p> | 21.0 | 22 | R2 | -8.806 | -66.965 | -6014.29 | A: Arg765;<br>B: Gln762;<br>A: Gln1010;<br>A: Arg1014;<br>A: Gln954 | B: Leu1012 hy-<br>dropobic | A: Gln954 |
|----|-------------------------------------------------------------------------------------------------------------------------------------------------------------------------------------|------|----|----|--------|---------|----------|---------------------------------------------------------------------|----------------------------|-----------|

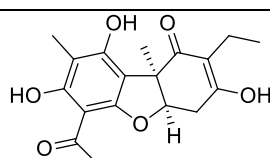

|                                                                                              |                                                                                     |      |         |    |        |         |          |                                         |                                           |
|----------------------------------------------------------------------------------------------|-------------------------------------------------------------------------------------|------|---------|----|--------|---------|----------|-----------------------------------------|-------------------------------------------|
| 12                                                                                           |  | 91.0 | >25 (5) | R2 | -6.180 | -54.713 | -6009.85 | A: Gln1010;<br>B: Arg765;<br>A: Glu1017 | B: Ala766;<br>B: Leu1012 hy-<br>drophobic |
| Chemical Formula: C <sub>18</sub> H <sub>20</sub> O <sub>6</sub><br>Molecular Weight: 332,35 |                                                                                     |      |         |    |        |         |          |                                         |                                           |



|    |                                                                                                                                                                                   |     |   |        |        |         |          |                          |                                     |
|----|-----------------------------------------------------------------------------------------------------------------------------------------------------------------------------------|-----|---|--------|--------|---------|----------|--------------------------|-------------------------------------|
| 13 | 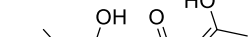 <p>Chemical Formula: C<sub>18</sub>H<sub>20</sub>O<sub>6</sub><br/>Molecular Weight: 332,35</p> | 6.7 | 5 | D3; R3 | -4.288 | -35.676 | -6081.82 | B: Arg1019<br>B: Asn1023 | B: Leu 1024; B: Ala1020 hydrophobic |
|----|-----------------------------------------------------------------------------------------------------------------------------------------------------------------------------------|-----|---|--------|--------|---------|----------|--------------------------|-------------------------------------|
